# Supplementary material for: Gene Expression Signature in Peripheral Blood Detects Thoracic Aortic Aneurysm
Source: PLoS One. 2007 Oct 17;2(10):e1050. doi: 10.1371/journal.pone.0001050 (PMC2002514; doi:10.1371/journal.pone.0001050)
Supplement: Table S3 — 113 candidate signature genes distinguishing familial vs. sporadic TAA, identified based on microarray data and SAM analysis (ave. FC>1.3 and FDR<4%) (0.03 MB XLS) [file pone.0001050.s004.xls]

## Sheet: Sheet1
Array_ProbeID	Primary_Gene_ID	Gene_Symbol	Gene_Name	Target RefSeqs	Expression (Sporadic vs. Familial)	Fold Change (Sporadic vs. Familial)
228136	hCG2007536				Up	2.155
103474	84752	MGC4655		NM_033309	Up	1.61763
128232	9600	PITPNM1	phosphatidylinositol transfer protein, membrane-associated 1	NM_004910	Up	1.32758
125981	9063	PIAS2	protein inhibitor of activated STAT, 2	NM_004671|NM_173206	Up	1.49998
112571	271	AMPD2	adenosine monophosphate deaminase 2 (isoform L)	NM_203404|NM_139156|NM_004037	Up	1.63977
183150	5018	OXA1L	oxidase (cytochrome c) assembly 1-like	NM_005015	Up	1.32954
111538	hCG1648136.3				Up	1.36671
134526	51592	TRIM33	tripartite motif-containing 33	NM_033020|NM_015906	Up	1.36737
147486	80778	ZNF34	zinc finger protein 34 (KOX 32)	NM_030580	Up	1.78646
125158	2203	FBP1	fructose-1,6-bisphosphatase 1	NM_000507	Up	1.84606
170495	84329	MGC15619		NM_032369	Up	1.49809
216838	8310	ACOX3	acyl-Coenzyme A oxidase 3, pristanoyl	NM_003501	Up	1.60401
143036	79797	ZNF408	zinc finger protein 408	NM_024741	Up	1.51848
118564	60682	SMAP1	stromal membrane-associated protein 1	NM_021940	Up	1.42769
191794	359948	IRF2BP2	interferon regulatory factor 2 binding protein 2		Up	1.35687
149386	84310	MGC11257		NM_032350	Up	1.52441
229426	56930	LOC56930			Up	1.33279
146512	143	PARP4	poly (ADP-ribose) polymerase family, member 4	NM_006437	Up	1.43841
204117	79705	LRRK1	leucine-rich repeat kinase 1	NM_024652	Up	2.06915
190176	25851	DKFZP434B0335		NM_015395	Up	1.53911
152252	440746	LOC440746|LOC148413		XM_378823|XM_378949	Up	1.55358
234801	738	C11orf2|ABHD2	chromosome 11 open reading frame2|abhydrolase domain containing 2		Up	1.72086
234540	hCG1812088.2				Up	1.34405
122515	622	BDH1	3-hydroxybutyrate dehydrogenase, type 1	NM_004051|NM_203315|NM_203314	Up	1.74515
185249	2073	ERCC5	excision repair cross-complementing rodent repair deficiency, complementation group 5 (xeroderma pigmentosum, complementation group G (Cockayne syndrome))	NM_000123	Up	1.43838
172361	55888	ZNF167	zinc finger protein 167	NM_018651	Up	2.05848
133968	84769	FKSG24		NM_032683	Up	1.6313
212663	hCG1644309.4				Up	1.3888
197113	84105	PCBD2	pterin-4 alpha-carbinolamine dehydratase/dimerization cofactor of hepatocyte nuclear factor 1 alpha (TCF1) 2	NM_032151	Up	1.66078
137150	9878	C14orf92	chromosome 14 open reading frame 92	NM_014828	Up	1.30358
108946	83692	CD99L2	CD99 antigen-like 2		Up	1.46678
232803	149832	LOC149832			Up	1.34967
183813	150580	LOC150580		XM_017374	Up	1.32626
187598	81502	HM13	histocompatibility (minor) 13	NM_030789	Up	1.42944
208490	9019	MPZL1	myelin protein zero-like 1	NM_003953|NM_024569	Up	1.60171
191050	23005	MAPKBP1	mitogen activated protein kinase binding protein 1	NM_014994	Up	1.61033
111979	25962	KIAA1429	KIAA1429	NM_015496	Up	1.33168
149932	9647	PPM1F	protein phosphatase 1F (PP2C domain containing)	NM_014634	Up	1.46055
140313	hCG1984284.1				Up	1.40237
180080	9827	KIAA0258	KIAA0258		Up	1.53102
216936	93183	PIGM	phosphatidylinositol glycan, class M	NM_145167	Up	1.47613
152041	2588	GALNS	galactosamine (N-acetyl)-6-sulfate sulfatase (Morquio syndrome, mucopolysaccharidosis type IVA)	NM_000512	Up	1.37999
228757	hCG1993223				Up	1.38529
205389	hCG1786715.2				Up	1.43473
169078	55223	TRIM62	tripartite motif-containing 62	NM_018207	Up	1.63235
187161	83641	C10orf45	chromosome 10 open reading frame 45	NM_031453	Up	1.31876
191104	hCG2043656				Up	1.37163
191074	143384	C10orf46	chromosome 10 open reading frame 46	NM_153810	Up	1.39044
192716	122011	CSNK1A1L	casein kinase 1, alpha 1-like	NM_145203	Up	1.44504
111298	80351	TNKS2	tankyrase, TRF1-interacting ankyrin-related ADP-ribose polymerase 2		Up	1.35201
172558	29894	CPSF1	cleavage and polyadenylation specific factor 1, 160kDa	NM_013291	Up	1.44271
108944	23130	KIAA0404		NM_015104	Up	1.63324
150498	80126	FLJ23185			Up	1.7733
136308	5826	ABCD4	ATP-binding cassette, sub-family D (ALD), member 4	NM_005050|NM_020326|NM_020323|NM_020324|NM_020325	Up	1.44915
231499	hCG1641044.3				Up	1.85673
202190	8554	PIAS1	protein inhibitor of activated STAT, 1	NM_016166	Up	1.31212
230576	hCG1990845				Up	1.59079
144438	55257	C20orf20	chromosome 20 open reading frame 20	NM_018270	Up	1.35424
133386	54850	FBXL12	F-box and leucine-rich repeat protein 12	NM_017703	Up	1.35872
147610	79943	ZNF696	zinc finger protein 696	NM_030895	Up	1.94024
234456	55206	SBNO1	sno, strawberry notch homolog 1 (Drosophila)	NM_018183	Up	1.35685
116130	hCG21407.2				Up	1.35411
213889	6433	SFRS8	splicing factor, arginine/serine-rich 8 (suppressor-of-white-apricot homolog, Drosophila)	NM_004592|NM_152235	Up	1.33973
162511	79789	CLMN	calmin (calponin-like, transmembrane)	NM_024734	Up	1.8281
134614	133957	LOC133957		NM_145265	Up	1.3474
100537	1376	CPT2	carnitine palmitoyltransferase II	NM_000098	Up	1.40632
151402	132160	PPM1M	protein phosphatase 1M (PP2C domain containing)	NM_144641	Up	1.36266
200830	79600	FLJ21127		NM_024549	Up	1.61579
123648	55252	ASXL2	additional sex combs like 2 (Drosophila)	NM_018263	Up	1.38164
106732	19	ABCA1	ATP-binding cassette, sub-family A (ABC1), member 1	NM_005502	Up	1.99134
154619	9329	GTF3C4	general transcription factor IIIC, polypeptide 4, 90kDa	NM_012204	Up	2.31646
105822	23075	SWAP70		NM_015055	Up	1.47578
205221	25921	ZDHHC5	zinc finger, DHHC-type containing 5	NM_015457	Up	1.34937
173863	26503	SLC17A5	solute carrier family 17 (anion/sugar transporter), member 5	NM_012434	Up	1.36616
166975	4174	MCM5	MCM5 minichromosome maintenance deficient 5, cell division cycle 46 (S. cerevisiae)	NM_006739	Up	1.31313
234342	hCG2002600				Up	1.49504
103150	5175	PECAM1	platelet/endothelial cell adhesion molecule (CD31 antigen)		Up	1.4912
105417	60686	C14orf93	chromosome 14 open reading frame 93	NM_021944	Up	1.34811
146270	116988	CENTG3	centaurin, gamma 3	NM_031946	Up	1.68194
102060	11026	LILRA3	leukocyte immunoglobulin-like receptor, subfamily A (without TM domain), member 3	NM_006865	Up	1.62453
124061	5451	POU2F1	POU domain, class 2, transcription factor 1	NM_002697	Up	1.44493
151082	593	BCKDHA	branched chain keto acid dehydrogenase E1, alpha polypeptide	NM_000709	Up	1.59142
190941	79786	C16orf44	chromosome 16 open reading frame 44	NM_024731	Up	1.40619
103357	138151	BTBD14A	BTB (POZ) domain containing 14A		Up	1.31319
195535	5362	PLXNA2	plexin A2	NM_025179	Up	1.86822
142909	29992	PILRA	paired immunoglobin-like type 2 receptor alpha	NM_013439|NM_178272|NM_178273	Up	1.54498
208318	387723	LOC387723			Up	1.60233
145493	hCG1991909				Up	1.51667
189611	10528	NOL5A	nucleolar protein 5A (56kDa with KKE/D repeat)	NM_006392	Up	1.45074
232908	140688	C20orf112	chromosome 20 open reading frame 112		Up	1.35437
543875	hCG2039082				Up	1.72131
212759	2821	GPI	glucose phosphate isomerase	NM_000175	Up	1.35824
122680	5223	PGAM1	phosphoglycerate mutase 1 (brain)		Up	1.35705
235408	hCG1995474				Up	1.59552
159112	3930	LBR	lamin B receptor	NM_002296|NM_194442	Up	1.5455
168775	26118	WSB1	WD repeat and SOCS box-containing 1	NM_134265|NM_015626|NM_134264	Up	1.46012
157688	55578	FAM48A	family with sequence similarity 48, member A	NM_017569|NM_001014286	Up	1.36495
180498	91368	MGC13017		NM_080656	Up	1.40699
203969	83855	KLF16	Kruppel-like factor 16	NM_031918	Up	1.69749
235754	252884	ZNF396	zinc finger protein 396		Up	1.77106
158604	6272	SORT1	sortilin 1	NM_002959	Up	2.07027
182030	hCG39829.2				Up	1.35683
146792					Up	1.35837
107450	283232	TMEM80	transmembrane protein 80	NM_174940	Up	1.35227
198882	6667	SP1	Sp1 transcription factor	NM_138473	Up	1.71697
206064	9424	KCNK6	potassium channel, subfamily K, member 6	NM_004823	Up	1.38381
139438	27036	SIGLEC7	sialic acid binding Ig-like lectin 7	NM_014385|NM_016543	Up	1.51104
152152	10216	PRG4	proteoglycan 4	NM_005807	Up	2.2687
111473	23604	DAPK2	death-associated protein kinase 2	NM_014326	Up	1.48395
187829	5607	MAP2K5	mitogen-activated protein kinase kinase 5	NM_145162|NM_145161|NM_002757|NM_145160	Up	1.3979
235687	hCG2008738				Up	1.38241
155786	8635	RNASET2	ribonuclease T2	NM_003730	Up	1.48454
117353	55109	AGGF1	angiogenic factor with G patch and FHA domains 1	NM_018046	Up	1.39943
